# Supplementary material for: Facile synthesis of a polyether-tethered dimeric berberine as a highly effective DNA-cleaving agent in the presence of Cu(ii) ion
Source: Royal Society of Chemistry journal article supplement (doi:10.1039/c3md00136a), 2013-01-01
Supplement: c3md00136a.pdf [file c3md00136a.pdf]

## Supporting Information

### Facile synthesis of a polyether-tethered dimeric berberine as a highly effective DNA-cleaving agent in the presence of Cu(II) ion

Yong-Min Wang <sup>a</sup>, Chun-Qiong Zhou <sup>a</sup>, Jin-Xiang Chen <sup>a</sup>, Yan-Ling Lin <sup>a</sup>, Wei Zeng <sup>b</sup>, Bi-Cheng Kuang <sup>a</sup>, Wei-Long Fu <sup>a</sup> and Wen-Hua Chen <sup>a,\*</sup>

<sup>a</sup> *School of Pharmaceutical Sciences, Southern Medical University, Guangzhou 510515, P. R. China*

<sup>b</sup> *School of Chemistry and Chemical Engineering, South China University of Technology, Guangzhou 510640, P. R. China*

*Generals.* <sup>1</sup>H NMR spectra were recorded in CDCl<sub>3</sub> and DMSO-*d*<sub>6</sub> using a Varian Mercury 400 spectrometer and TMS as an internal reference. ESI-MS and HR-ESI-MS spectra were measured on Waters UPLC/Quattro Premier XE and Agilent 6460 Triple Quadrupole mass spectrometers, respectively. Agarose GE was conducted on DYY-8C electrophoresis apparatus and DYCP-31DN electrophoresis chamber, and detected on Alpha Hp 3400 fluorescence and visible light digital image analyzer. UV-Vis and fluorescence spectra were measured on a TU-1901 spectrophotometer and a HITACHI F-2500 spectrofluorimeter, respectively.

CT DNA and plasmid pBR322 DNA were obtained from Sigma-Aldrich and Takara Chemical Co., respectively. Their solutions were prepared in 5 mM Tris-HCl buffer (5 mM NaCl, pH 7.0).

The concentration of CT DNA was determined spectrophotometrically using the molar extinction coefficient of  $13,200 \text{ M}^{-1}\text{cm}^{-1}$  per base pair (bp) at 260 nm. Compound **1** and berberrubine **3** were prepared according to reported protocols.<sup>1,2</sup> All the other chemicals and reagents were obtained from commercial sources and used without further purification. Buffer solutions were prepared in triply distilled deionized water.

### Synthesis of compounds **1** and **2**

*1,11-Ditosyl-3,6,9-trioxaundecane 4*. The synthesis was conducted according to reported protocols.<sup>2</sup> Specifically, tetraethylene glycol (1.37 g, 7.0 mmol) was dissolved in dichloromethane (15 mL). *p*-Toluenesulfonyl chloride (2.70 g, 14 mmol) was added and the mixture was cooled to 0 °C with an ice bath. Powdered KOH (3.19 g, 56 mmol) was carefully added in small portions so that the mixture was kept below 5 °C. After stirring for 4.5 h at 0 °C, dichloromethane (15 mL) and ice-water (30 mL) were added. The organic layer was separated and the water layer was extracted with dichloromethane (15 mL×2). The combined organic layers were washed with saturated NaHCO<sub>3</sub> aqueous solution (30 mL×2), dried over anhydrous MgSO<sub>4</sub>. After removal of solvent under reduced pressure, the obtained residue was purified by chromatography on a silica gel column, eluting with petroleum ether (60~90 °C)/ethyl acetate (2/1, v/v), to give compound **4** (2.72 g, 77%) having <sup>1</sup>H-NMR (400 MHz, CDCl<sub>3</sub>) δ 7.81 (d, *J* = 8.4 Hz, 4H), 7.36 (d, *J* = 8.0 Hz, 4H), 4.17 (t, *J* = 4.8 Hz, 4H), 3.70 (t, *J* = 4.8 Hz, 4H), 3.58 (br, 8H), 2.46 (s, 6H). The data of <sup>1</sup>H NMR were in accordance with those reported by Bazan *et al.*<sup>3</sup>

*Compound 1*. To a solution of berberrubine **3** (320 mg, 1.0 mmol) in MeCN (20 mL) was added

1,11-ditosyl-3,6,9-trioxaundecane **4** (243 mg, 0.48 mmol). The resulting mixture was refluxed for 6 days, and then concentrated under reduced pressure. The obtained residue was subject to anion exchange into chloride form, and subsequently purified by chromatography on a reverse-phase column, eluting with a gradient of methanol in water (0-10%), to give compound **1** (360 mg, 86%) as a yellow powder having  $^1\text{H-NMR}$  (400 MHz,  $\text{DMSO-}d_6$ )  $\delta$  9.66 (s, 2H), 8.85 (s, 2H), 8.05 (d,  $J = 9.6$  Hz, 2H), 7.88 (d,  $J = 9.2$  Hz, 2H), 7.69 (s, 2H), 7.05 (s, 2H), 6.15 (s, 4H), 4.95-4.92 (m, 4H), 4.28-4.26 (m, 4H), 3.89 (s, 6H), 3.78-3.76 (m, 4H), 3.65 (s, 8H), 3.20 (m, 4H); ESI MS  $m/z$ : 401.9 ( $[\text{M}-2\text{Cl}]^{2+}$ ) and HRMS for  $\text{C}_{46}\text{H}_{46}\text{N}_2\text{O}_{11}$  ( $[\text{M}-2\text{Cl}]^{2+}$ ) Calc: 401.1545, Found: 401.1538.

*Tetraethylene glycol monomethyl ether tosylate 5*. The synthesis was conducted according to reported protocols.<sup>3</sup> Specifically, a solution of tetraethylene glycol monomethyl ether (1.54 g, 7.42 mmol) and *p*-toluenesulfonyl chloride (1.49 g, 7.83 mmol) in anhydrous dichloromethane (15 mL) was cooled to 0 °C with an ice bath. Powdered KOH (1.37 g, 30 mmol) was carefully added in small portions. The resulting mixture was stirred at 0 °C for 4 h, and dichloromethane (15 mL) and ice-water (30 mL) were added. The organic layer was separated and the water layer was extracted with dichloromethane (15 mL $\times$ 2). The combined organic layers were washed with water (10 mL), dried over anhydrous  $\text{MgSO}_4$ . After removal of solvent under reduced pressure, the obtained residue was purified by chromatography on a silica gel column, eluting with ligroin (60~90 °C)/ethyl acetate (2/1, v/v), to give compound **4** (2.08 g, 78%) having  $^1\text{H-NMR}$  (400 MHz,  $\text{CDCl}_3$ )  $\delta$  7.80 (d,  $J = 8.4$  Hz, 2H), 7.34 (d,  $J = 8.0$  Hz, 2H), 4.16 (t,  $J = 4.8$  Hz, 2H), 3.69 (t,  $J = 4.8$  Hz, 2H), 3.65~3.62 (m, 6H), 3.58 (s, 4H), 3.55~3.53 (m, 2H), 3.37 (s, 3H), 2.45 (s, 3H).

The data of  $^1\text{H}$  NMR were in accordance with those reported by Bazan *et al.*<sup>3</sup>

**Compound 2.** To a solution of berberrubine **3** (134 mg, 0.42 mmol) in MeCN (15 mL) was added compound **5** (148 mg, 0.41 mmol). The resulting mixture was refluxed for 7 days, and then concentrated under reduced pressure. The obtained residue was subject to anion exchange into chloride form, and subsequently purified by chromatography on a reverse-phase column, eluting with a gradient of methanol in water (0-15%), to give compound **2** (173 mg, 79%) as a yellow powder having  $^1\text{H}$ -NMR (400 MHz, DMSO- $d_6$ )  $\delta$  9.78 (s, 1H), 8.96 (s, 1H), 8.20 (d,  $J = 9.2$  Hz, 1H), 8.02 (d,  $J = 9.2$  Hz, 1H), 7.81 (s, 1H), 7.10 (s, 1H), 6.18 (s, 2H), 4.94 (t,  $J = 6.2$  Hz, 2H), 4.43-4.41 (m, 2H), 4.07 (s, 3H), 3.82-3.80 (m, 2H), 3.61-3.58 (m, 2H), 3.54-3.51 (m, 2H), 3.47-3.42 (m, 6H), 3.36-3.35 (m, 2H), 3.22 (t,  $J = 6.2$  Hz, 2H), 3.16 (s, 3H); ESI MS  $m/z$ : 512.9 ( $[\text{M}-\text{Cl}]^+$ ) and HRMS for  $\text{C}_{28}\text{H}_{34}\text{NO}_8$  ( $[\text{M}-\text{Cl}]^+$ ) Calc: 512.2284, Found: 512.2279.

### Experimental procedures for Agarose GE

The cleavage experiments were conducted by using the methods similar to those described previously.<sup>4-6</sup> Specifically, a mixture of pBR322 DNA (0.5 g/L, 0.7  $\mu\text{L}$ ) and a metal complex of each ligand was diluted with 5 mM Tris-HCl buffer (5 mM NaCl, 5% DMF, pH 7.0) to 16  $\mu\text{L}$  and incubated at 37 °C for 5 h. The reaction was quenched by adding loading buffer containing 0.035% bromophenol blue, 36% glycerol, 30 mM EDTA and 0.05% xylene cyanol FF. The solution was then loaded on 1% agarose gel containing EB (1.0 mg/L), and analyzed with electrophoresis in Tris-acetate-EDTA (TAE) buffer (pH 8.0). Bands were visualized by UV light

and photographed.

The kinetics for the DNA cleavage was investigated at 37 °C for different intervals of time, by varying the concentrations of **1**@Cu(II) from 0 to 200 μM in 5 mM Tris-HCl buffer (5 mM NaCl, 5% DMF, pH 7.0). The percentage of the supercoiled DNA form was determined, and plotted against time for each concentration of **1**@Cu(II). The data were fitted with a single-exponential curve (*pseudo* first-order kinetics) to give the  $k_{\text{obs}}$  values. The  $k_{\text{obs}}$  values were then plotted versus the concentrations of **1**@Cu(II) (Eq. (1)), allowing the determination of the corresponding maximal first-order rate constant  $k_{\text{max}}$  and Michaelis constant  $K_{\text{M}}$ .

$$k_{\text{obs}} = k_{\text{max}}[\mathbf{1}@\text{Cu}(\text{II})] / (K_{\text{M}} + [\mathbf{1}@\text{Cu}(\text{II})]) \quad (1)$$

For mechanistic investigations, inhibition reaction was carried out in the presence of NaN<sub>3</sub> (10 mM), TMP (0.2 mM), KI (10 mM), DMSO (1.0 mM) and *t*-BuOH (1.0 mM), followed by addition of **1**@Cu<sup>2+</sup>.

### **X-ray crystallography**

All the measurements were made on a Rigaku Mercury CCD X-ray diffractometer by using graphite monochromated Mo K ( $\lambda = 0.71070 \text{ \AA}$ ). The crystal of compound **1** with CuCl<sub>2</sub> was mounted at the top of a glass fiber with grease. Cell parameters were refined by using the program CrystalClear (Rigaku and MSC, Ver. 1.3, 2001). The collected data were reduced by using the program CrystalStructure (Rigaku and MSC, Ver. 3.60, 2004) while an absorption correction (multiscan) was applied. A summary of the key crystallographic information was

tabulated in Table S1. Crystallographic data (without structure factors) for the structures reported in this article have been deposited with the Cambridge Crystallographic Data Centre (CCDC) as supplementary publication numbers CCDC-928678.

**Table S1.** Crystallographic data for the crystal of compound **1** with CuCl<sub>2</sub>.

| Compound                                       | Compound <b>1</b> with CuCl <sub>2</sub>                                                       |
|------------------------------------------------|------------------------------------------------------------------------------------------------|
| Molecular formula                              | C <sub>46</sub> H <sub>46</sub> N <sub>2</sub> O <sub>11</sub> Cl <sub>6</sub> Cu <sub>2</sub> |
| Formula weight                                 | 1142.65                                                                                        |
| Crystal system                                 | monoclinic                                                                                     |
| Space group                                    | <i>P21/c</i>                                                                                   |
| <i>a</i> (Å)                                   | 13.515(3)                                                                                      |
| <i>b</i> (Å)                                   | 13.241(3)                                                                                      |
| <i>c</i> (Å)                                   | 29.681(9)                                                                                      |
| $\alpha$ (°)                                   | 90.00                                                                                          |
| $\beta$ (°)                                    | 109.70(3)                                                                                      |
| $\gamma$ (°)                                   | 90.00                                                                                          |
| <i>V</i> (Å <sup>3</sup> )                     | 5001(2)                                                                                        |
| <i>Z</i>                                       | 42                                                                                             |
| <i>T</i> /K                                    | 293(2)                                                                                         |
| <i>D</i> <sub>calc</sub> (g cm <sup>-3</sup> ) | 1.518                                                                                          |
| $\lambda$ (Mo-K $\alpha$ ) (Å)                 | 0.71073                                                                                        |
| $\mu$ (cm <sup>-1</sup> )                      | 1.230                                                                                          |
| Total reflections                              | 40398                                                                                          |
| Unique reflections                             | 11397                                                                                          |
| No. observations                               | 4298                                                                                           |
| No. parameters                                 | 606                                                                                            |

|                                          |        |
|------------------------------------------|--------|
| $R^a$                                    | 0.0908 |
| $wR^b$                                   | 0.1852 |
| GOF <sup>c</sup>                         | 1.024  |
| $\Delta\rho_{\max}$ (e Å <sup>-3</sup> ) | 1.286  |
| $\Delta\rho_{\min}$ (e Å <sup>-3</sup> ) | -0.725 |

---

<sup>a</sup>  $R = \Sigma||F_o|-|F_c||/\Sigma|F_o|$ ;

<sup>b</sup>  $wR = \{\Sigma[w(F_o^2-F_c^2)^2]/\Sigma[w(F_o^2)^2]\}^{1/2}$ ;

<sup>c</sup> GOF (Goodness-Of-Fit) =  $\{\Sigma[w(F_o^2-F_c^2)^2]/(n-p)\}^{1/2}$ , where  $n$  = number of reflections and  $p$  = total numbers of parameters refined.

#### References:

1. Y. Qin, J.-Y. Pang, W.-H. Chen, Z. Cai, Z.-H. Jiang, *Bioorg. Med. Chem.* **2006**, *14*, 25–32.
2. K. Iwasa, M. Kamigauchi, M. Ueki, T. Taniguchi, *Eur. J. Med. Chem.* **1996**, *31*, 469–478.
3. C. A. Traina, R. C. Bakus II, G. C. Bazan, *J. Am. Chem. Soc.* **2011**, *133*, 12600–12607.
4. C.-Q. Zhou, Y.-L. Lin, J.-X. Chen, L.-S. Wang, N.-N. Yang, W. Zeng, W.-H. Chen, *Bioorg. Med. Chem. Lett.* **2012**, *22*, 5853–5856.
5. C.-Q. Zhou, Y.-L. Lin, J.-X. Chen, W.-H. Chen, *Chem. Biodiv.* **2012**, *9*, 1125–1132.
6. J.-X. Chen, W.-E. Lin, C.-Q. Zhou, L. F. Yau, J.-R. Wang, B. Wang, W.-H. Chen, Z.-H. Jiang, *Inorg. Chim. Acta* **2011**, *376*, 389–395.

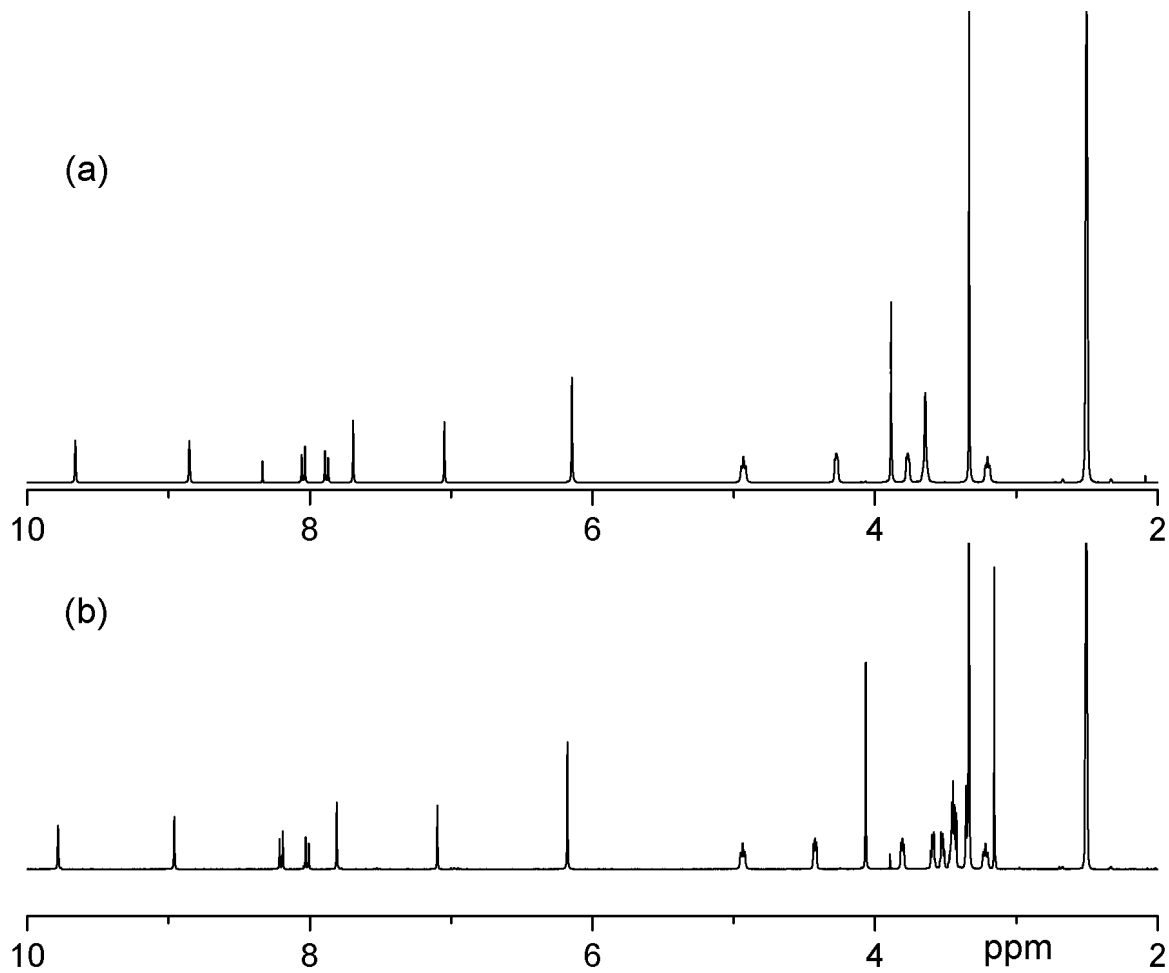

Figure S1.  $^1\text{H}$  NMR (400 MHz,  $\text{DMSO-}d_6$ ) spectra of compounds **1** (a) and **2** (b). Signal assignments are described in the synthetic procedures.



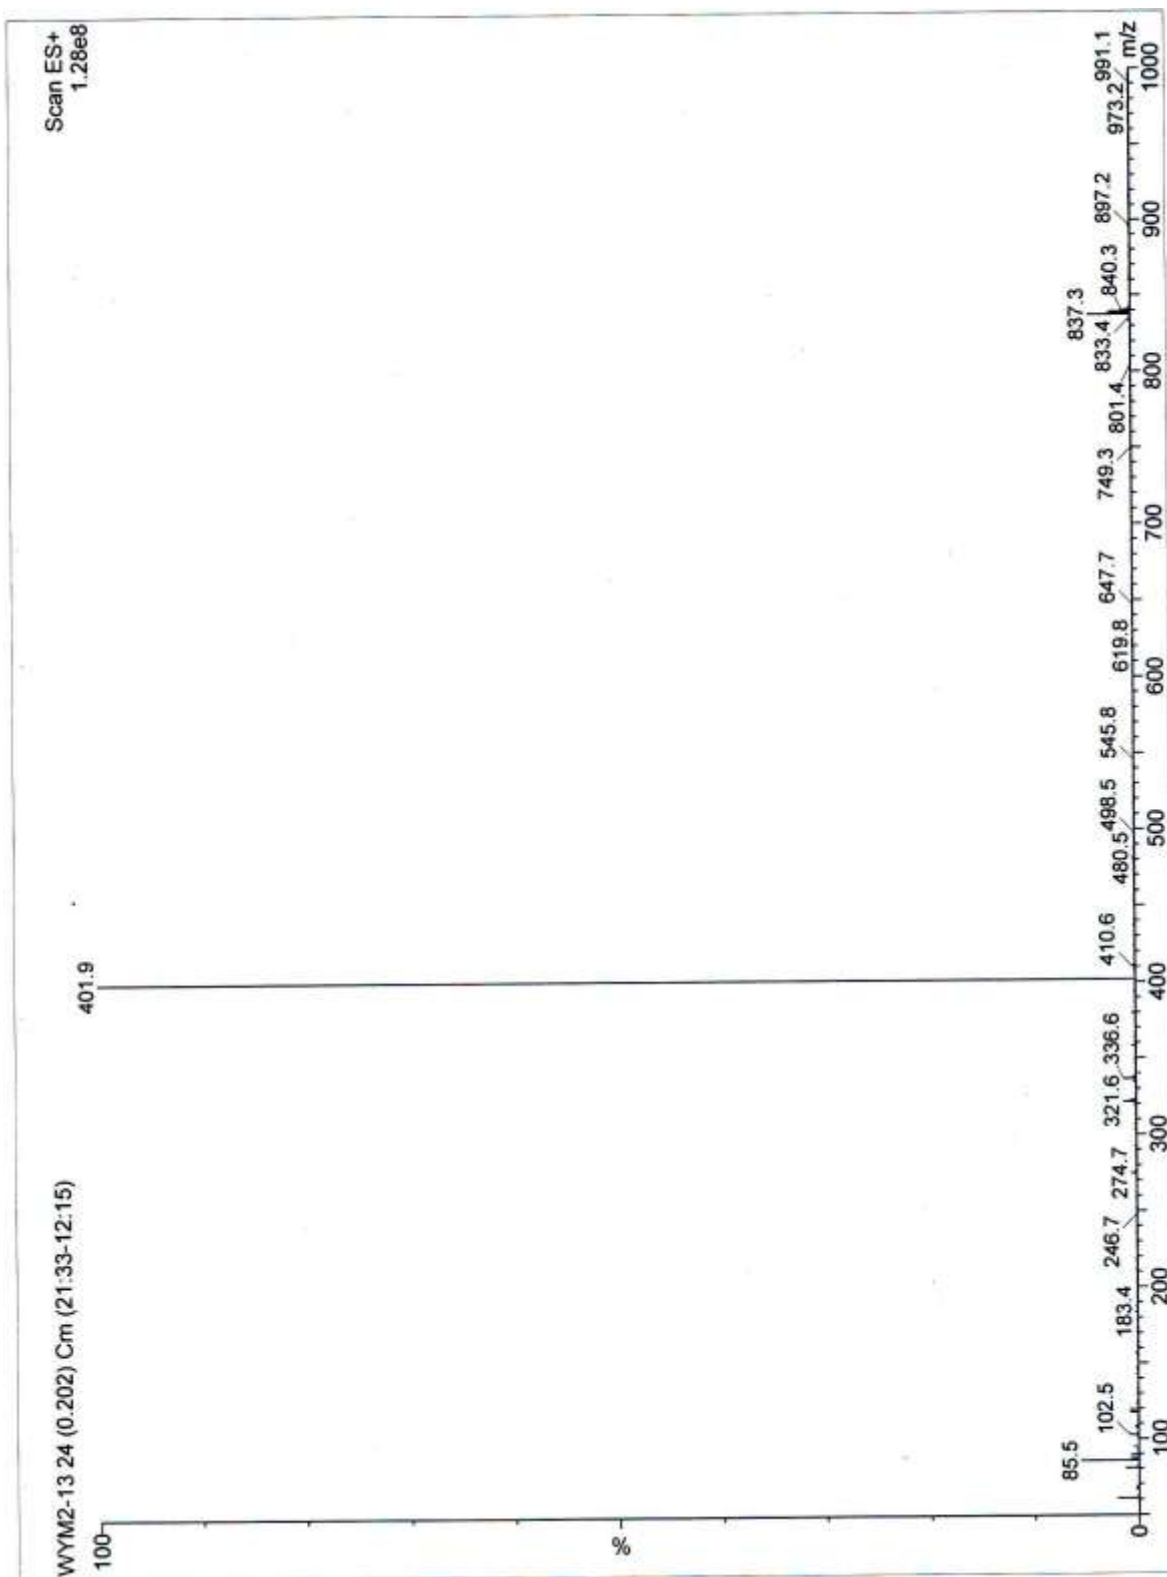

Figure S2. ESI-MS spectrum of compound 1.

Formula Predictor Report - wym2-13.lcd

Page 1 of 1

Data File: F:\wytym\wym2-13.lcd

| Elmt | Val. | Min | Max | Use Adduct |
|------|------|-----|-----|------|------|-----|-----|------|------|-----|-----|------|------|-----|-----|------------|
| H    | 1    | 0   | 50  | N    | 3    | 0   | 2   | P    | 3    | 0   | 0   | Br   | 1    | 0   | 0   | H          |
| B    | 3    | 0   | 0   | O    | 2    | 0   | 15  | S    | 2    | 0   | 0   | I    | 3    | 0   | 0   | No         |
| C    | 4    | 0   | 50  | F    | 1    | 0   | 0   | Cl   | 1    | 0   | 0   | Pt   | 2    | 0   | 0   |            |

Error Margin (ppm): 200

HC Ratio: unlimited

Max Isotopes: all

MSn Iso RI (%): 90.00

DBE Range: 0.0 - 3000.0

Apply N Rule: no

Isotope RI (%): 1.00

MSn Logic Mode: AND

Electron Ions: both

Use MSn Info: yes

Isotope Res: 10000

Max Results: 500

Event#: 1 MS(E+) Ret. Time: 0.280 -> 0.280 Scan#: 85 -> 85

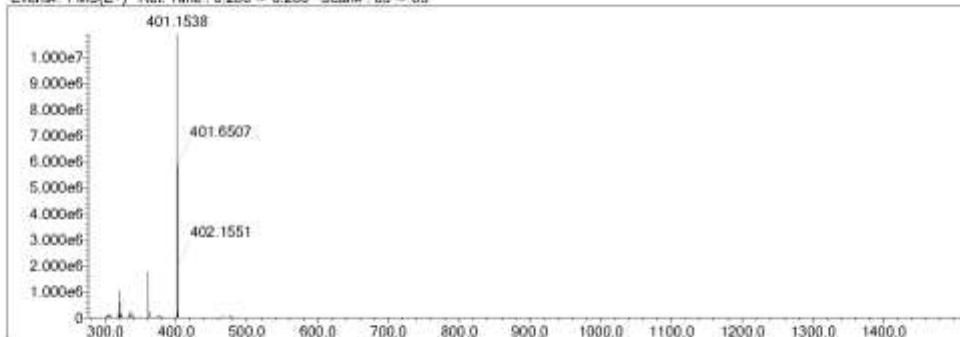

Measured region for 401.1538 m/z.

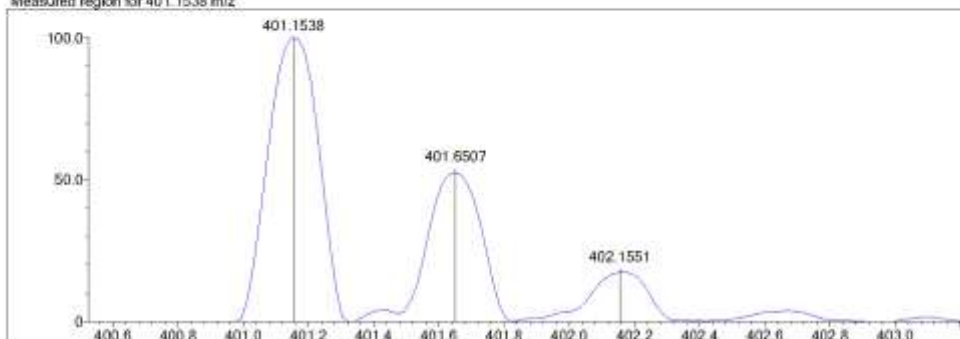

C46 H46 N2 O11 [M]2+ : Predicted region for 401.1545 m/z.

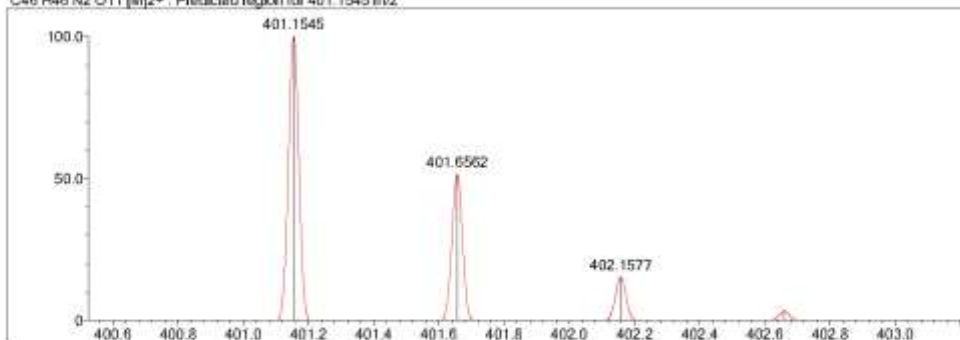

| Rank | Score | Formula (M)    | Ion   | Meas. m/z | Pred. m/z | Df. (mDa) | Df. (ppm) | Iso   | DBE  |
|------|-------|----------------|-------|-----------|-----------|-----------|-----------|-------|------|
| 3    | 65.15 | C46 H46 N2 O11 | [M]2+ | 401.1538  | 401.1545  | -0.7      | -1.74     | 66.38 | 25.0 |

Figure S3. HR-ESI-MS spectrum of compound 1.

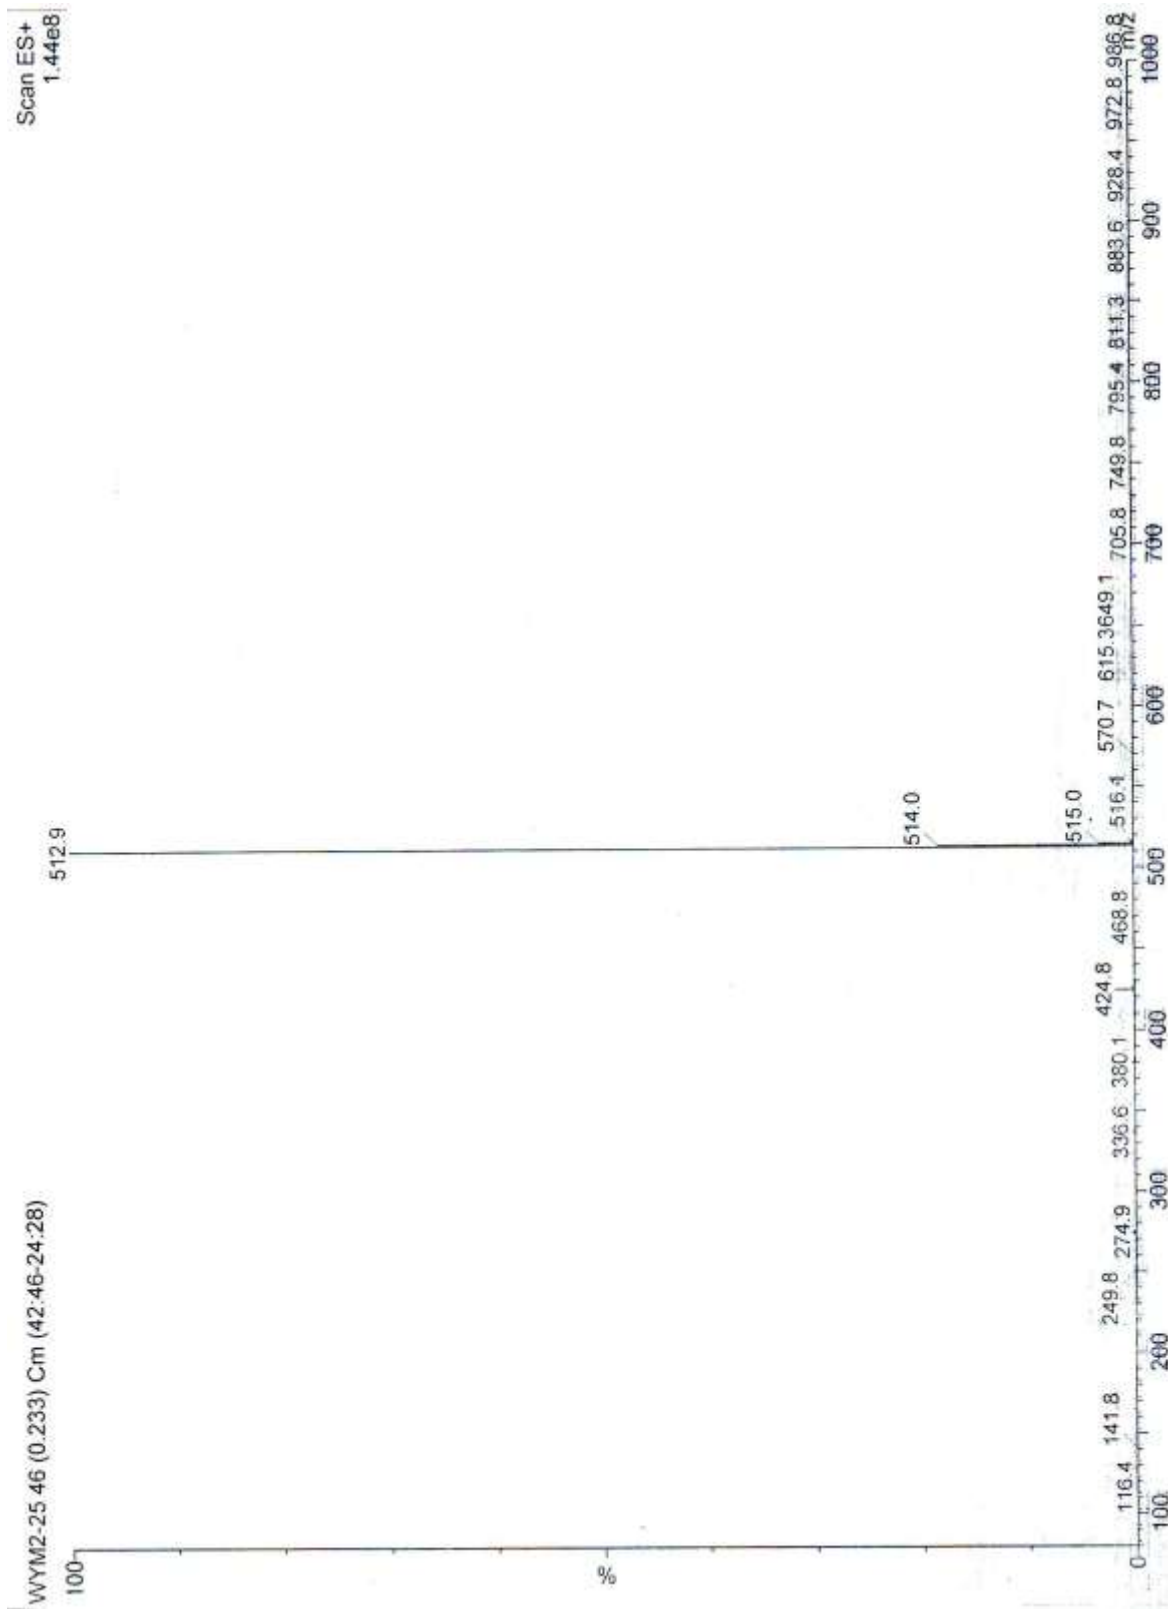

Figure S4. ESI-MS spectrum of compound 2.

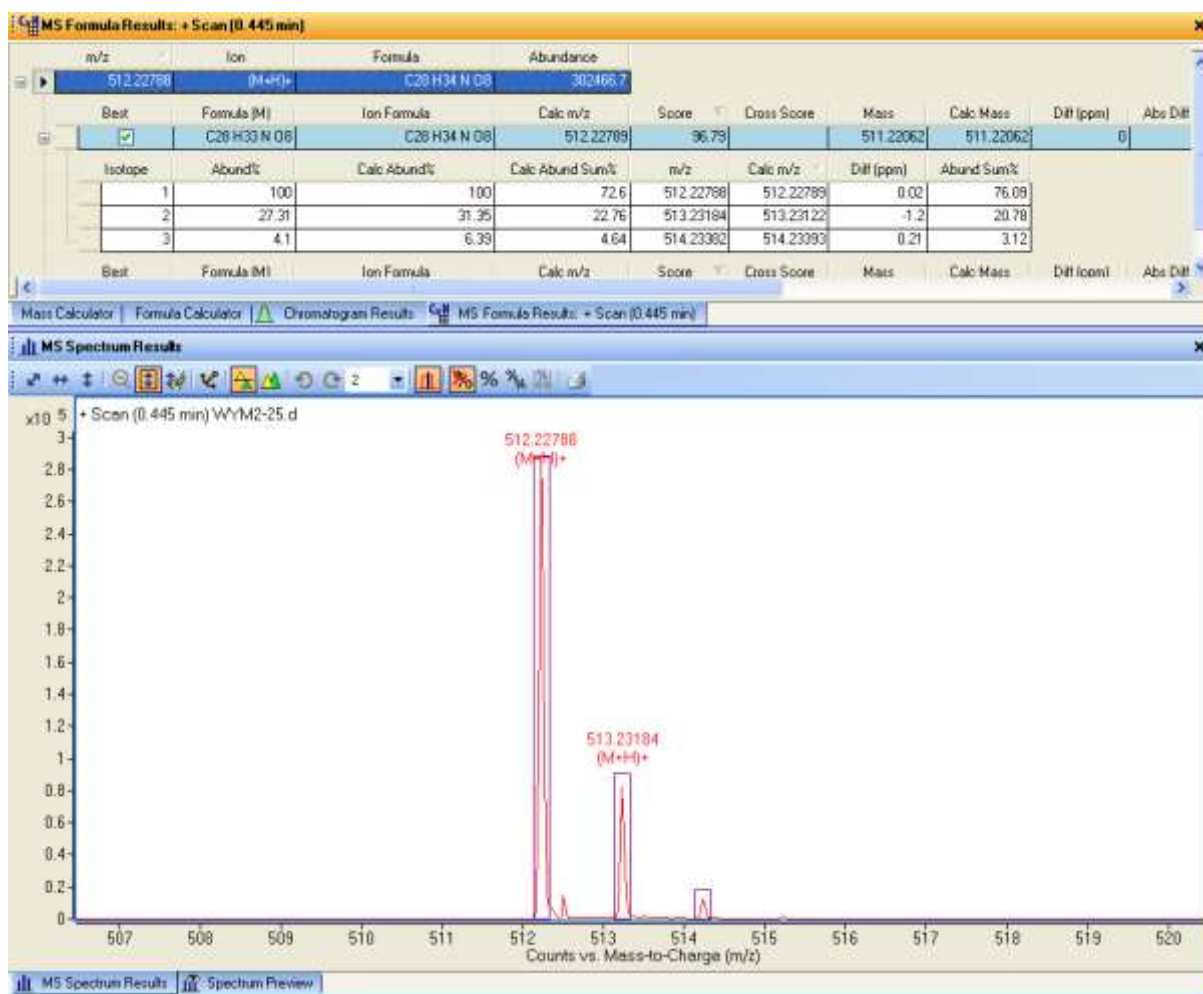

Figure S5. HR-ESI-MS spectrum of compound 2.
